# Supplementary material
Source: HighWire-hosted journal article supplement (https://tsaco.smart01.highwire.org/content/9/1/e001274)
Supplement: inline-supplementary-material-1 [file inline-supplementary-material-1.pdf]

## The Community of Trauma Care Partnering with Stakeholders to Improve Injury Outcomes: Focus Group Analysis

Appelbaum RD et al.  
Trauma Surgery and Acute Care Open  
Month Year

### Study Aim:

- To capture stakeholder perspectives to assure research is meaningful, respectful, and relevant to the injured patient and their caregivers

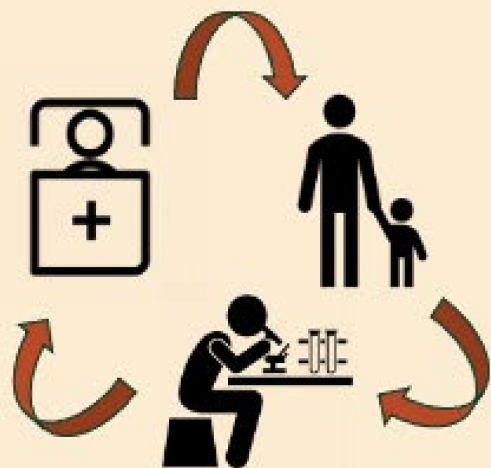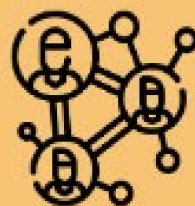

19 Trauma Centers  
10 90min Focus Group Sessions:  
Recorded, Transcribed, and  
Analyzed

### Topics Discussed:

- Patients' motivation to join research studies
- Preferences regarding consent
- Suggestions for increasing diversity and access
- Feelings regarding outcomes, efficacy, and exception from informed consent

### Conclusions:

- Common themes found in preferences, motivations, and best practices to increase participation

### Next Steps:

- Vignette-based survey to establish broad stakeholder consensus
- Education and dissemination of strategies to increase research engagement
- Formation of a panel of patients to support future research endeavors

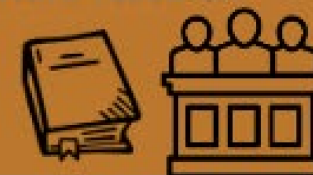

TRAUMA  
SURGERY  
& ACUTE  
CARE OPEN

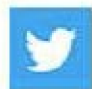

@TSACO\_AAST
